# Supplementary material for: A chemical defense deters cannibalism in migratory locusts
Source: Research Square preprint supplement (doi:10.21203/rs.3.rs-1799688/v1), 2022-07-01
Supplement: Supplementary file 3 [file 530b121a24dda36d4e76b1a8.xlsx]

## Sheet: Sheet1
OR70 cloning F	ATGGAAATGTATCAGGGAAAAGGTATGCTGAAGAC
OR70 cloning R	TCAGTTATGCGACGCCAAGTCCTTCATG
OR70 genotyping F	GGTCGAGTGAAATGAAACCGCGTTCAGT
OR70 genotyping R	CACCTCCAAACAGGACCATGGCTAGTTAAG
CYP305M2 genotyping F	ATGAGCACTGGCCACATGGGTAAATGCTACAATA
CYP305M2 genotyping R	cgTATCAAGGCCAGAGGTGGTTGTTCTAAGT
