# Supplementary material for: A chemical defense deters cannibalism in migratory locusts
Source: Research Square preprint supplement (doi:10.21203/rs.3.rs-1799688/v1), 2022-07-01
Supplement: Supplementary file 4 [file bb6c66b944ee2306d883b3cb.xlsx]

## Sheet: Sheet1
number	compound
1	Nonanal
2	3-Methylbutanal
3	3-methyl-2-butanol
4	3-Pentanol
5	Acetoin
6	3-Pentanone
7	3-Methyl-1-butanol
8	2-Methyl-1-butanol
9	1-Pentanol
10	Prenol
11	Acetylacetone
12	Butanoic acid
13	2,3-Butanediol
14	2,4-Dimethylheptane
15	3-Hexen-1-ol
16	2-methylButyric acid
17	1-Hexanol
18	Isoamyl acetate
19	2-Methylbutyl acetate
20	Cyclohexanol
21	3-Methylcyclopentyl acetate
22	2-Heptanone
23	Pentanoic acid
24	2-Butoxyethanol
25	Anisole
26	Acetic acid, pentyl ester
27	3-Carene
28	Benzaldehyde
29	1-Octen-3-ol
30	Phenol
31	6-Methyl-5-heptene-2-one
32	(E,E)-2,4-Heptadienal
33	3-Octanol
34	Hexanoic acid, ethyl ester
35	Limonene
36	2-Ethylhexanol
37	Benzyl alcohol
38	2,5-Dimethylpyrazine
39	Benzeneacetaldehyde
40	γ-Caprolactone
41	Citronellol
42	o-Cresol
43	Tetradecane
44	Undecane
45	Acetophenone
46	Heptanoic acid
47	Dodecane
48	1-Octanol
49	Linalool oxide
50	Hexanoic acid
51	Guaiacol
52	(±)-linalool
53	Diacetone alcohol
54	Phenylethyl Alcohol
55	Benzyl nitrile
56	Veratrole
57	1,4-Dimethoxybenzene
58	Benzoic acid
59	Dodecanal
60	Ethylphenol
61	Methyl salicylate
62	Decanal
63	β-Cyclocitral
64	Nonanoic acid
65	1-Tetradecanol
66	Pentadecane
67	Farnesan
68	4-Ethylguaiacol
69	2-Undecanone
70	Indole
71	Hexadecane
72	Eugenol
73	4-Vinylveratrole
74	Vanillin
75	2-Tridecanone
76	β-Ionone
77	Octadecane
78	Butylated Hydroxytoluene
79	Dihydroactinidiolide
80	Dodecanoic acid
81	2-Pentadecanone
82	Tetradecanoic acid
83	Dodecanoic acid, ethyl ester
84	Heptacosane
85	4-Methyl-1-hepten-5-one
86	Isoprenol
87	2-Methyl-3-pentanone
88	2-Penten-1-ol
89	Octane
90	Ethyl acetate
91	5-Cyano-1-pentene
92	2-Ethyl-1-butanol
93	1-Acetylcyclohexene
94	2-Heptanol
95	α-Pinene
96	2,6-Dimethyl-4-heptanol
97	Z)-4-Hepten-1-ol
98	Decane
99	Vinylanisole
100	4-Vinylphenol
101	Decanoic acid
102	Octanoic acid
103	L-α-Terpineol
104	1-Nonanol
105	Coumaran
106	Caprolactam
107	2-Methyl-benzaldoxime
108	1-Hexadecanol
109	Caryophyllene
110	1-Phenylethanol
111	m-Cresol
112	Nonane
113	Ebal
114	Catechol
115	Dibutylformamide
116	3-Methoxyacetophenone
117	2,5-Di-t-amyl-p-benzoquinone
118	1-Dodecanol
119	Isophorone
120	Isophthalaldehyde
121	2-Octyn-1-ol
122	3-Nonen-1-ol
123	N-Methylbenzamide
124	Butyrolactone
125	ortho-Hydroxypropiophenone
126	4-Heptanol
127	Methyl β-resorcylate
128	1-Butoxy-2-propanol
129	2,6-Dimethylcyclohexanol
130	(Z)-2-decenal
131	2-Methoxybenzyl alcohol
132	3-Acetonylcyclopentanone
133	Geranyl acetone
134	Methyl caproate
135	4-Acetonylcycloheptanone
136	1,3-Dimethyluraci
137	Benzenepropanenitrile
138	2,3-Pinanediol
139	Olivetol
140	Nerolidol
141	2-Hexenoic acid
142	2-Methoxy-4-propylphenol
143	2,4,6-Trimethylpyridine
144	1-Methylcycloheptanol
145	2-ethylhexyl acetate
146	(E)-2-Octen-1-ol
147	m-Methylanisole
148	β-Elemene
149	2,4-Dimethylheptane
150	β-Pinene
151	Isoborneol
152	2-Nonanone
153	Methyl benzoate
154	(+)-Cyclosativene
155	Humulene
156	Globulol
157	cis-β-Farnesene
158	trans-Nerolidol
159	(E)-2-Hexenal
160	Heptanal
161	Arosol
162	Benzothiazole
163	Propanamide, 2-hydroxy-
164	3-Methyl-2-buten-1-ol, acetate
165	Butylaldoxime
166	2-Isopropyl-5-methyl-2-hexenal
167	E-3-Methyl-2-hexenoic acid
168	Tetradecanal
169	Methylethylmaleimide
170	2-Decen-1-ol
171	3,4,5-Trimethoxyphenol
172	1-Pentadecanal
173	Neophytadiene
174	2-Pentanone
175	1-Penten-3-ol
176	2,4-Dimethoxyphenol
177	3-Acetylanisole
178	2-Methyl-5-isopropylpyrazine
179	1,2,4-Trimethoxybenzene
180	m-Cymene
181	Cinnamaldehyde
182	Triacetin
183	2,6-dimethoxy- Phenol,
184	2-Methoxy-4-vinylphenol
185	3,5-Dimethyloctane
186	α-pinene oixde
187	Glycerol
188	Ethyl myristate
189	4-Phenylpyridine
190	Dodecanoic acid, ethyl ester
191	ethyl palmitate
192	Squalene
193	Tetradecanoic acid
194	2-Ethyl-3,5-dimethylpyrazine
195	n-Hexadecanoic acid
196	Musk ketone
197	3,5-Dimethoxyacetophenone
198	1-Hexadecanol
199	Methyl oleate
200	Methyl stearate
201	Squalane
202	Octadecanoic acid, ethyl ester
203	Hexacosane
204	(Z,Z)-9,12-Octadecadienoic acid
205	(Z)-9-Octadecenamide
206	Octacosane
207	Homosalate
208	Octyl Palmitate
